# Supplementary material for: Large-volume air sample system for measuring 34 S∕ 32 S isotope ratio of carbonyl sulfide
Source: Copernicus journal article supplement (doi:10.5194/amt-12-1141-2019), 2019-02-22
Supplement: Supplementary file 1 [file amt-12-1141-2019-supplement.zip]

Archive with 2 entries (2 files):
- amt-2018-324-supplement.xlsx
- amt-12-1141-2019-supplement-title-page.pdf
