# Supplementary material for: Large-volume air sample system for measuring 34 S∕ 32 S isotope ratio of carbonyl sulfide
Source: Copernicus journal article supplement (doi:10.5194/amt-12-1141-2019), 2019-02-22
Supplement: Supplementary file 1 [file amt-12-1141-2019-supplement.zip › amt-12-1141-2019-supplement-title-page.pdf]

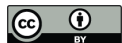

## *Supplement of*

# **Large-volume air sample system for measuring $^{34}\text{S}/^{32}\text{S}$ isotope ratio of carbonyl sulfide**

**Kazuki Kamezaki et al.**

*Correspondence to:* Shohei Hattori ([hattori.s.ab@m.titech.ac.jp](mailto:hattori.s.ab@m.titech.ac.jp))

- [amt-12-1141-2019-supplement-title-page.pdf](#)
- [amt-2018-324-supplement.xlsx](#)

The copyright of individual parts of the supplement might differ from the CC BY 4.0 License.
