# Supplementary material for: Large-volume air sample system for measuring 34 S∕ 32 S isotope ratio of carbonyl sulfide
Source: Copernicus journal article supplement (doi:10.5194/amt-12-1141-2019), 2019-02-22
Supplement: Supplementary file 1 [file amt-2018-324-supplement.xlsx]

## Sheet: Data used for Figure 3
Run	Sampling time	Flow rate	OCS amount	Expected OCS amounta
	(min)	(L min−1)	(nmol)	(nmol)
1	10	5	0.83	0.769792
2	０	5	0b	0
3	10	5	0.86	0.769792
4	０	5	0b	0
5	10	5	0.97	0.769792
6	０	5	0b	0
7	100	5	7.3	3.84896
8	0	5	0.012	0
9	50	5	3.8	3.84896
10	0	5	0b	0
11	100	5	7.3	3.84896
12	0	5	0b	0
13	50	5	3.5	7.69792
14	0	5	0b	0
15	50	5	3.4	7.69792
15	0	5	0b	0
aExpected OCS amounts calculated based on OCS concentration in sample F (380 nmol L−1) and sampling time,
bbelow detection limit

## Sheet: Data used for Figure 4
Method	OCS amount						d33S			d34S			D33S
	OCS injected amount	Measured area	Calculated OCS amount	S.D. (n = 3)	R.S.D. (n = 3)		Average	S.D.		Average	S.D.		Average	S.D.
	(nmol)	(V s−1)	(nmol)				(‰)			(‰)			(‰)
Syringe injection system with GC-IR-MS (S+)a	3	2.065	3.85903	0.163328	7.90934		7.98585	0.614844		14.3831	0.54865		0.595285	0.329971
	6	4.09533	6.4509	0.371614	9.0741		7.57392	0.178849		14.2167	0.0898227		0.271801	0.132713
	10	6.96367	9.90673	0.392357	5.63435		6.9882	0.0729768		14.0028	0.0135019		-0.199766	0.0720435
	15	9.79233	14.2265	0.516088	5.27032		7.23956	0.362786		14.2126	0.257655		-0.0576229	0.229994
Sampling/Purification system with GC-IR-MS (S+)	3	1.88	3.85903	0.137884	7.33426		7.2773	1.01872		13.2647	0.950408		0.46333	0.52736
	6	4.111	6.4509	0.0238956	0.58126		7.20766	0.403352		13.8133	0.210927		0.114489	0.349699
	15	7.19567	9.90673	0.247642	3.44154		6.92104	0.430506		13.7988	0.0967766		-0.162447	0.386369
aDeveloped system by Hattori et al. (2015)

## Sheet: Data used for Figure 5
Sample	Sample type	Concentration	Supplier		Syringe injection system with GC/IR-MS (S+)					Sampling/Purification system with GC/IR-MS (S+)
					n	d33S	d34S	D33S		n	d33S	d34S	D33S
						(‰)					(‰)
A	Commercial cylinder (Balanced with He)	0.105	-		3	6.5 ± 0.2	12.6 ± 0.4	0.03 ± 0.1		-	-	-	-
B	Commercial cylinder (Balanced with He)	5.9 mmol mol−1	-		3	7.0 ± 0.1	14.1 ± 0.2	−0.2 ± 0.1		3	6.9 ± 0.4	13.8 ± 0.4	−0.2 ± 0.4
C	Synthesized (CO + S reaction)	1	Wako		3	−3.3 ± 0.1	−6.3 ± 0.2	−0.06 ± 0.1		3	−2.8 ± 0.2	−5.5 ± 0.4	0.03 ± 0.2
D	Synthesized (CO + S reaction)	1	Sigma-Aldrich		3	1.1 ± 0.2	2.4 ± 0.2	−0.07 ± 0.1		3	1.5 ± 0.4	2.8 ± 0.7	0.08 ± 0.1
E	Synthesized (CO + S reaction)	1	Mixture of Wako and Sigma-Aldrich		3	−1.5 ± 0.1	−2.5 ± 0.2	−0.2 ± 0.1		3	−0.8 ± 0.6	−1.9 ± 0.6	−0.2 ± 0.3

## Sheet: Data used for Figure 6
Sample	Date (JST)	Area	OCS nmol	Volume	OCS concentration	d33S	d34S	D33S
		(V S−1)	(nmol)	(L)	(nmol L−1)	(‰)
Air	2018-04-23 12:00:00	10.24	9.7682	500 ± 25	485.401	-20.4283	10.3688	-25.5426
Air	2018-04-24	9.437	9.00219	500 ± 25	447.337	-54.8739	10.7395	-59.9008
Air	2018-04-24 12:00:00	10.972	10.4665	500 ± 25	520.1	-21.0429	10.3891	-26.1626
Air	2018-04-25	10.907	10.4045	500 ± 25	517.019	-22.9081	10.4419	-28.0398
Air collected in suzukakedai campus at Yokohama Japan

## Sheet: Data used for Figure 8
Preservation period	Ratio of Preserved OCS (%)										d34S−d34Sintial (‰)
	Sulfinert treated tubes								Stainless Steel tube		Sulfinert treated tubes		Stainless Steel tube
	-80°C	-80°C	-80°C	-80°C	-20°C	4°C	4°C		25°C		-80°C	-80°C	25°C
(day)	Run1	Run2	Run3	Run4	Run1	Run1	Run2		Run1		Run3	Run4	Run1
0	100	100	100	100	100	100	100		100		0	0	0
0.125	-	-	-	-	-	-	-		94		-	-	−0.2
1	100	96.2025	88.7157	100.966	-	-	-		-		0.0872425	0.00405722	-
3	100	100	-	-	103.571	77.907	78.3208		77.6046		-	-	-
7	105	112.658	97.0275	98.6224	96.4286	40.6977	68.6047		-		-0.351736	-0.29998	-
14	108.861	94.186	101.405	102.514	-	-	-		33.1557		-0.0417745	-0.0223147	-
30	100	86.5633	-	-	107.143	-	-		7.68783		-	-	-
90	106.54	103.341	-	-	-	-	-		-		-	-	-
